# Supplementary material for: Iridium-platinum alloy nanoparticles: Composition-dependent electrocatalytic activity for formic acid oxidation
Source: Royal Society of Chemistry journal article supplement (doi:10.1039/c1jm00077b), 2011-01-01
Supplement: c1jm00077b.pdf [file c1jm00077b.pdf]

Electronic Supplementary Information

## Iridium-Platinum Alloy Nanoparticles: Composition-Dependent Electrocatalytic Activity for Formic Acid Oxidation

Wei Chen<sup>\*†</sup> and Shaowei Chen<sup>\*‡</sup>

<sup>†</sup> *State Key Laboratory of Electroanalytical Chemistry, Changchun Institute of Applied  
Chemistry, Chinese Academy of Sciences, Changchun, Jilin 130022, China*

<sup>‡</sup> *Department of Chemistry and Biochemistry, University of California, Santa Cruz, California  
95064 USA*

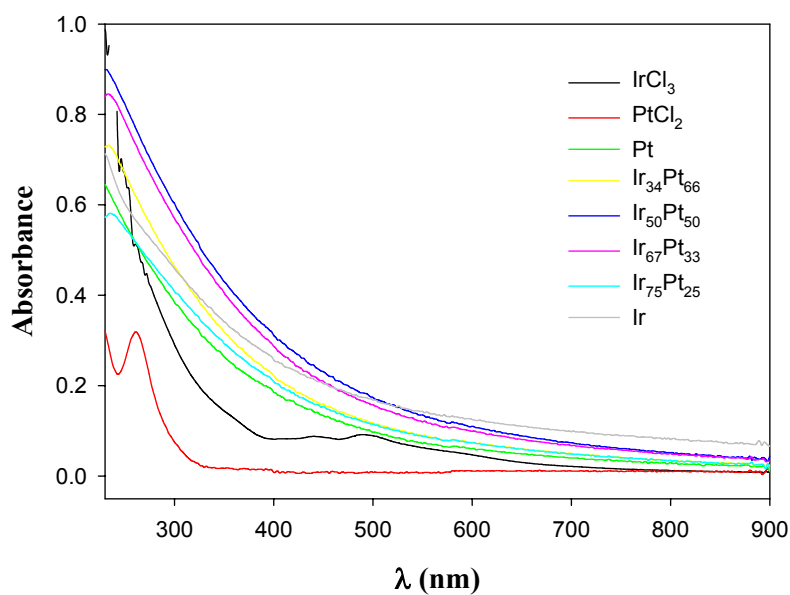

**Figure S1.** UV-visible spectra of Ir<sub>x</sub>Pt<sub>100-x</sub> nanoparticles ( $x = 100$  to  $0$ ). All the particle concentrations are  $0.1$  mg/mL in CH<sub>2</sub>Cl<sub>2</sub>. For the IrCl<sub>3</sub> and PtCl<sub>2</sub> precursors, the concentrations are  $1$  mM in water.

<sup>\*</sup> To whom all correspondence should be addressed. E-mail: [weichen@ciac.jl.cn](mailto:weichen@ciac.jl.cn); [shaowei@ucsc.edu](mailto:shaowei@ucsc.edu)

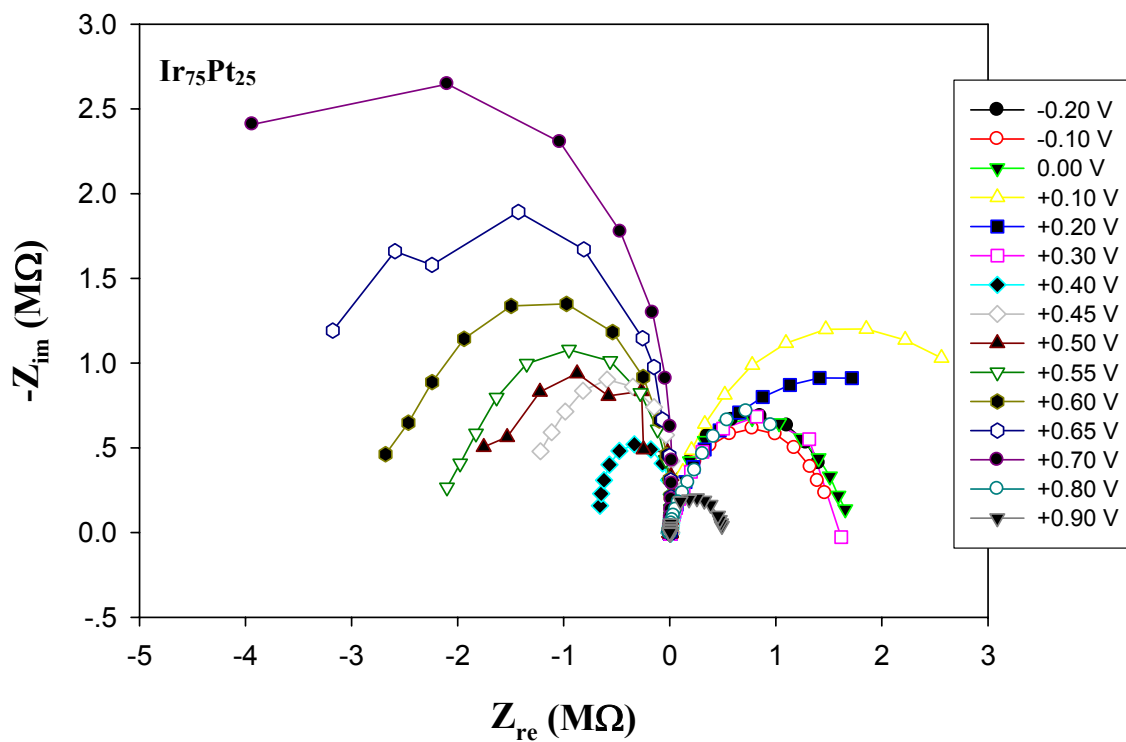

**Figure S2.** Complex-plane electrochemical impedance plots (Nyquist plots) of the  $\text{Ir}_{75}\text{Pt}_{25}/\text{Au}$  electrode in 0.1 M  $\text{HCOOH}$  + 0.1 M  $\text{HClO}_4$  at various electrode potentials.

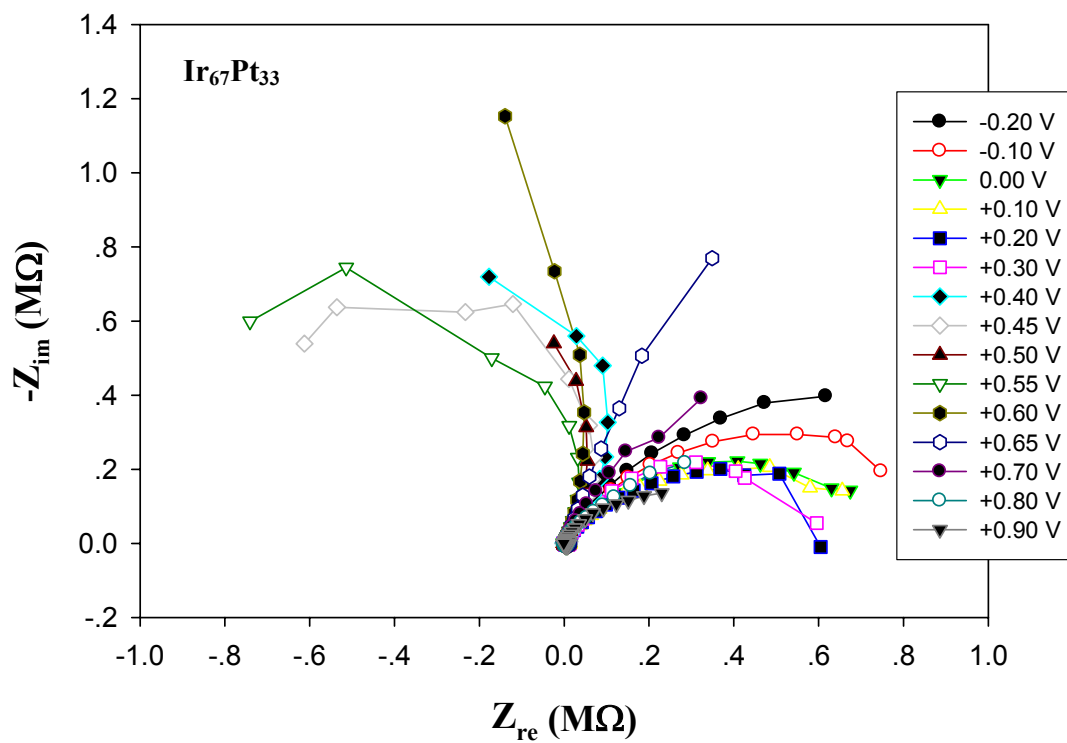

**Figure S3.** Complex-plane electrochemical impedance plots (Nyquist plots) of the  $\text{Ir}_{67}\text{Pt}_{33}/\text{Au}$  electrode in 0.1 M  $\text{HCOOH}$  + 0.1 M  $\text{HClO}_4$  at various electrode potentials.

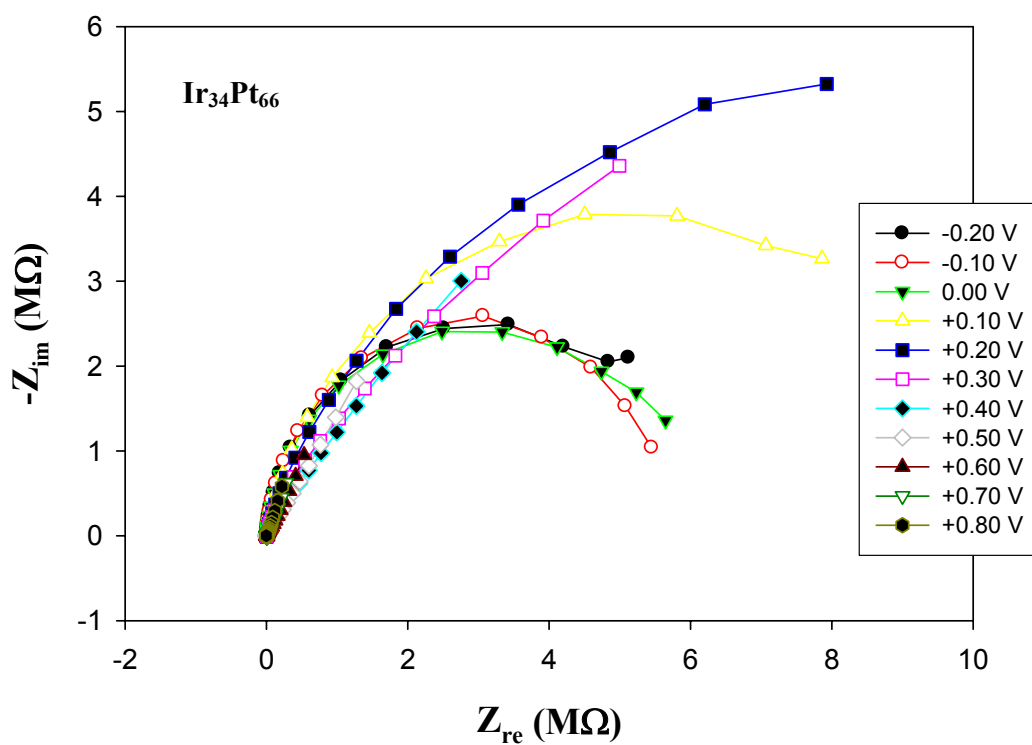

**Figure S4.** Complex-plane electrochemical impedance plots (Nyquist plots) of the  $\text{Ir}_{34}\text{Pt}_{66}/\text{Au}$  electrode in 0.1 M  $\text{HCOOH}$  + 0.1 M  $\text{HClO}_4$  at various electrode potentials.
